# Supplementary material
Source: PubMed Central journal article supplement (PMC9342588)

Disclosure Purpose: 22-04399

Summary of Interests

**Company or Organization**

| Entity                                                                                                                                                                                                                                                                                                                                                                                                                                                                 | Type             | Interest Held By |
|------------------------------------------------------------------------------------------------------------------------------------------------------------------------------------------------------------------------------------------------------------------------------------------------------------------------------------------------------------------------------------------------------------------------------------------------------------------------|------------------|------------------|
| <a href="#">Centers for Disease Control and Prevention</a>                                                                                                                                                                                                                                                                                                                                                                                                             | Grant / Contract | Self             |
| <p><i>Recipient Name:</i> Riley Hospital for Children/Indiana University School of Medicine/Trustees of Indiana University<br/> <i>Grant / Contract Purpose:</i> Research</p> <p><i>Recipient Type:</i> Institution<br/> <i>Grant / Contract Description:</i><br/> <i>Additional Information:</i> I received funding from the CDC to Riley Hospital for Children in support of this work and that the funding was specifically for the work described in the paper</p> |                  |                  |

Additional Questions:

- Are there other relationships or activities that readers could perceive to have influenced, or that give the appearance of potentially influencing, what you wrote in the submitted work?**  
No.
- What is the manuscript title?**  
Maternal vaccination and risk of Covid-19 hospitalization among infants
- Are you the corresponding author?**  
No.

Certification

I certify that the information provided in this disclosure is complete and accurate.

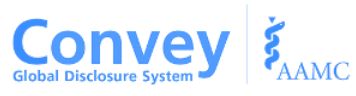

**Disclosure Purpose:** 22-04399

## Summary of Interests

| Company or Organization                                                                                                                                                             |                  |                                                                                                                   |
|-------------------------------------------------------------------------------------------------------------------------------------------------------------------------------------|------------------|-------------------------------------------------------------------------------------------------------------------|
| Entity                                                                                                                                                                              | Type             | Interest Held By                                                                                                  |
| <a href="#">Centers for Disease Control and Prevention</a>                                                                                                                          | Grant / Contract | Self                                                                                                              |
| <i>Recipient Name:</i> Nationwide Children's Hospital<br><i>Grant / Contract Description:</i> Funded by CDC, via subcontract through Boston Children's Hospital coordinating center |                  | <i>Recipient Type:</i> Institution<br><i>Grant / Contract Purpose:</i> Research<br><i>Additional Information:</i> |

## Additional Questions:

- Are there other relationships or activities that readers could perceive to have influenced, or that give the appearance of potentially influencing, what you wrote in the submitted work?**  
No.
- What is the manuscript title?**  
Maternal vaccination and risk of Covid-19 hospitalization among infants
- Are you the corresponding author?**  
No.

## Certification

I certify that the information provided in this disclosure is complete and accurate.

**Disclosure Purpose:** 22-04399

## Summary of Interests

| Entity                                                                                                                                                                                             | Type             | Interest Held By |
|----------------------------------------------------------------------------------------------------------------------------------------------------------------------------------------------------|------------------|------------------|
| Centers for Disease Control and Prevention                                                                                                                                                         | Grant / Contract | Self             |
| <i>Recipient Name:</i> Baylor College of Medicine<br><i>Grant / Contract Description:</i> New Vaccine Surveillance Network<br><i>Additional Information:</i> effort supported by grant as local PI |                  |                  |
| <i>Recipient Type:</i> Institution<br><i>Grant / Contract Purpose:</i> Other - public health surveillance                                                                                          |                  |                  |
| Centers for Disease Control and Prevention                                                                                                                                                         | Grant / Contract | Self             |
| <i>Recipient Name:</i> Baylor College of Medicine<br><i>Grant / Contract Description:</i> Funded by CDC via subcontract through Boston Children's Hospital coordinating center                     |                  |                  |
| <i>Recipient Type:</i> Institution<br><i>Grant / Contract Purpose:</i> Research<br><i>Additional Information:</i>                                                                                  |                  |                  |

## Additional Questions:

- Are there other relationships or activities that readers could perceive to have influenced, or that give the appearance of potentially influencing, what you wrote in the submitted work?**  
No.
- What is the manuscript title?**  
BNT162b2 Protection From Omicron Hospitalizations in Children and Adolescents
- Are you the corresponding author?**  
No.

## Certification

I certify that the information provided in this disclosure is complete and accurate.

**Disclosure Purpose:** 22-04399

## Summary of Interests

| Company or Organization                                                                                                                                                              |                  |                                                                                                                   |
|--------------------------------------------------------------------------------------------------------------------------------------------------------------------------------------|------------------|-------------------------------------------------------------------------------------------------------------------|
| Entity                                                                                                                                                                               | Type             | Interest Held By                                                                                                  |
| <a href="#">Boston Children's Hospital</a>                                                                                                                                           | Grant / Contract | Self                                                                                                              |
| <i>Recipient Name:</i> Children's Hospital New Orleans<br><i>Grant / Contract Description:</i> Funded by CDC, via subcontract through Boston Children's Hospital coordinating center |                  | <i>Recipient Type:</i> Institution<br><i>Grant / Contract Purpose:</i> Research<br><i>Additional Information:</i> |

## Additional Questions:

- Are there other relationships or activities that readers could perceive to have influenced, or that give the appearance of potentially influencing, what you wrote in the submitted work?**  
No.
- What is the manuscript title?**  
Maternal vaccination and risk of Covid-19 hospitalization among infants)
- Are you the corresponding author?**  
No.

## Certification

I certify that the information provided in this disclosure is complete and accurate.

**Disclosure Purpose:** 22-04399

## Summary of Interests

**Company or Organization**

| Entity                                                     | Type             | Interest Held By |
|------------------------------------------------------------|------------------|------------------|
| <a href="#">Centers for Disease Control and Prevention</a> | Grant / Contract | Self             |

*Recipient Name:* Rady Children's Hospital/UC San Diego  
*Grant / Contract Description:* Funding specifically for work described in the paper  
*Additional Information:*

*Recipient Type:* Institution  
*Grant / Contract Purpose:* Other - public health surveillance

## Additional Questions:

- Are there other relationships or activities that readers could perceive to have influenced, or that give the appearance of potentially influencing, what you wrote in the submitted work?**  
No.
- What is the manuscript title?**  
Maternal Vaccination and Risk of Covid-19 Hospitalization Among Infants
- Are you the corresponding author?**  
No.

## Certification

I certify that the information provided in this disclosure is complete and accurate.

**Disclosure Purpose:** 22-04399

### Summary of Interests

I do not have any interests to disclose at this time.

### Additional Questions:

- Are there other relationships or activities that readers could perceive to have influenced, or that give the appearance of potentially influencing, what you wrote in the submitted work?**  
No.
- What is the manuscript title?**  
Maternal vaccination and risk of Covid-19 hospitalization among infants
- Are you the corresponding author?**  
No.

### Certification

I certify that the information provided in this disclosure is complete and accurate.

**Disclosure Purpose:** 22-04399

## Summary of Interests

| Company or Organization                                                                                                                                                                      |                  |                                                                                                                   |
|----------------------------------------------------------------------------------------------------------------------------------------------------------------------------------------------|------------------|-------------------------------------------------------------------------------------------------------------------|
| Entity                                                                                                                                                                                       | Type             | Interest Held By                                                                                                  |
| <a href="#">Centers for Disease Control and Prevention</a>                                                                                                                                   | Grant / Contract | Self                                                                                                              |
| <i>Recipient Name:</i> Children's Hospital of Philadelphia<br><i>Grant / Contract Description:</i> Funded by the CDC, via subcontract through Boston Children's Hospital coordinating center |                  | <i>Recipient Type:</i> Institution<br><i>Grant / Contract Purpose:</i> Research<br><i>Additional Information:</i> |

## Additional Questions:

- Are there other relationships or activities that readers could perceive to have influenced, or that give the appearance of potentially influencing, what you wrote in the submitted work?**  
No.
- What is the manuscript title?**  
Maternal vaccination and risk of Covid-19 hospitalization among infants
- Are you the corresponding author?**  
No.

## Certification

I certify that the information provided in this disclosure is complete and accurate.

Disclosure Purpose: 22-04399

Summary of Interests

**Company or Organization**

| Entity                                                                                                                                               | Type             | Interest Held By                                                                |
|------------------------------------------------------------------------------------------------------------------------------------------------------|------------------|---------------------------------------------------------------------------------|
| Centers for Disease Control and Prevention                                                                                                           | Grant / Contract | Self                                                                            |
| <i>Recipient Name:</i> Ann & Robert H Lurie Children's Hospital of Chicago<br><i>Grant / Contract Description:</i><br><i>Additional Information:</i> |                  | <i>Recipient Type:</i> Institution<br><i>Grant / Contract Purpose:</i> Research |

Additional Questions:

- Are there other relationships or activities that readers could perceive to have influenced, or that give the appearance of potentially influencing, what you wrote in the submitted work?**  
No.
- What is the manuscript title?**  
Maternal vaccination and risk of Covid-19 hospitalization among infants
- Are you the corresponding author?**  
No.

Certification

I certify that the information provided in this disclosure is complete and accurate.

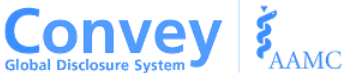



**Disclosure Purpose:** 22-04399

## Summary of Interests

| Company or Organization                                                                                                                                                 |                  |                                                                                                                   |
|-------------------------------------------------------------------------------------------------------------------------------------------------------------------------|------------------|-------------------------------------------------------------------------------------------------------------------|
| Entity                                                                                                                                                                  | Type             | Interest Held By                                                                                                  |
| <a href="#">Centers for Disease Control and Prevention</a>                                                                                                              | Grant / Contract | Self                                                                                                              |
| <i>Recipient Name:</i> University of Utah<br><i>Grant / Contract Description:</i> Funded by CDC, via subcontract through Boston Children's Hospital coordinating center |                  | <i>Recipient Type:</i> Institution<br><i>Grant / Contract Purpose:</i> Research<br><i>Additional Information:</i> |

## Additional Questions:

- Are there other relationships or activities that readers could perceive to have influenced, or that give the appearance of potentially influencing, what you wrote in the submitted work?**  
No.
- What is the manuscript title?**  
Maternal vaccination and risk of Covid-19 hospitalization among infants
- Are you the corresponding author?**  
No.

## Certification

I certify that the information provided in this disclosure is complete and accurate.

Disclosure Purpose: 22-04399

Summary of Interests

**Company or Organization**

| Entity                                                                                                                                                                                                                                                                                           | Type             | Interest Held By                                                                |
|--------------------------------------------------------------------------------------------------------------------------------------------------------------------------------------------------------------------------------------------------------------------------------------------------|------------------|---------------------------------------------------------------------------------|
| <b>Centers for Disease Control and Prevention</b>                                                                                                                                                                                                                                                | Grant / Contract | Self                                                                            |
| <i>Recipient Name:</i> University of Nebraska<br><i>Grant / Contract Description:</i> Payment for the work that lead to the paper<br><i>Additional Information:</i>                                                                                                                              |                  | <i>Recipient Type:</i> Institution<br><i>Grant / Contract Purpose:</i> Research |
| <b>NIH Clinical Center</b>                                                                                                                                                                                                                                                                       | Grant / Contract | Self                                                                            |
| <i>Recipient Name:</i> University of Nebraska<br><i>Grant / Contract Description:</i> Subcontract of NIH funding to study influenza<br><i>Additional Information:</i> Given clinical similarities some of the work done for this sub-contract on the grant helped lead to the data in this paper |                  | <i>Recipient Type:</i> Institution<br><i>Grant / Contract Purpose:</i> Research |

Additional Questions:

- Are there other relationships or activities that readers could perceive to have influenced, or that give the appearance of potentially influencing, what you wrote in the submitted work?**  
No.
- What is the manuscript title?**  
Effectiveness of BNT162b2 Vaccine Against Omicron Hospitalizations in Children and Adolescents
- Are you the corresponding author?**  
No.

Certification

I certify that the information provided in this disclosure is complete and accurate.

**Disclosure Purpose:** 22-04399

## Summary of Interests

| Company or Organization                                                                                                                                                                               |                  |                                                                                                                   |
|-------------------------------------------------------------------------------------------------------------------------------------------------------------------------------------------------------|------------------|-------------------------------------------------------------------------------------------------------------------|
| Entity                                                                                                                                                                                                | Type             | Interest Held By                                                                                                  |
| <a href="#">Centers for Disease Control and Prevention</a>                                                                                                                                            | Grant / Contract | Self                                                                                                              |
| <i>Recipient Name:</i> University of California San Francisco<br><i>Grant / Contract Description:</i> A public health study of COVID-19 vaccine effectiveness in preventing severe pediatric COVID-19 |                  | <i>Recipient Type:</i> Institution<br><i>Grant / Contract Purpose:</i> Research<br><i>Additional Information:</i> |

## Additional Questions:

- Are there other relationships or activities that readers could perceive to have influenced, or that give the appearance of potentially influencing, what you wrote in the submitted work?**  
No.
- What is the manuscript title?**  
Maternal vaccination and risk of Covid-19 hospitalization among infants
- Are you the corresponding author?**  
No.

## Certification

I certify that the information provided in this disclosure is complete and accurate.

**Disclosure Purpose:** 22-04399

## Summary of Interests

| Company or Organization                                                                                                       |            |                                                   |
|-------------------------------------------------------------------------------------------------------------------------------|------------|---------------------------------------------------|
| Entity                                                                                                                        | Type       | Interest Held By                                  |
| <a href="#">Lucira Health</a>                                                                                                 | Consultant | Self                                              |
| <i>Category:</i> Consultant<br><i>Additional Information:</i> One time reimbursement for virtual advisory board participation |            | <i>Description:</i> Virtual Advisory Board Member |

## Additional Questions:

- Are there other relationships or activities that readers could perceive to have influenced, or that give the appearance of potentially influencing, what you wrote in the submitted work?**  
No.
- What is the manuscript title?**  
Effectiveness of BNT162b2 Vaccine against Critical COVID-19 in Adolescents
- Are you the corresponding author?**  
No.

## Certification

I certify that the information provided in this disclosure is complete and accurate.

Disclosure Purpose: 22-04399

Summary of Interests

**Company or Organization**

| Entity                                                                                                                                                                                 | Type             | Interest Held By                                                                                                  |
|----------------------------------------------------------------------------------------------------------------------------------------------------------------------------------------|------------------|-------------------------------------------------------------------------------------------------------------------|
| Centers for Disease Control and Prevention                                                                                                                                             | Grant / Contract | Self                                                                                                              |
| <i>Recipient Name:</i> Cooperman Barnabas Medical Center<br><i>Grant / Contract Description:</i> Funded by CDC, via subcontract through Boston Children's Hospital coordinating center |                  | <i>Recipient Type:</i> Institution<br><i>Grant / Contract Purpose:</i> Research<br><i>Additional Information:</i> |

Additional Questions:

- Are there other relationships or activities that readers could perceive to have influenced, or that give the appearance of potentially influencing, what you wrote in the submitted work?  
No.
- What is the manuscript title?  
(Maternal vaccination and risk of Covid-19 hospitalization among infants)
- Are you the corresponding author?  
No.

Certification

I certify that the information provided in this disclosure is complete and accurate.

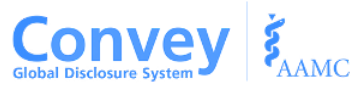

**Disclosure Purpose:** 22-04399

**Summary of Interests**

I do not have any interests to disclose at this time.

**Additional Questions:**

- 1. **Are there other relationships or activities that readers could perceive to have influenced, or that give the appearance of potentially influencing, what you wrote in the submitted work?**  
No.
- 2. **What is the manuscript title?**  
Maternal vaccination and risk of Covid-19 hospitalization among infants
- 3. **Are you the corresponding author?**  
No.

**Certification**

I certify that the information provided in this disclosure is complete and accurate.

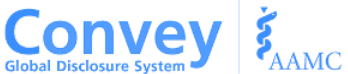

Disclosure Purpose: 22-04399

Summary of Interests

**Company or Organization**

| Entity                                                                                                                                                                                                 | Type             | Interest Held By                                                                |
|--------------------------------------------------------------------------------------------------------------------------------------------------------------------------------------------------------|------------------|---------------------------------------------------------------------------------|
| <b>Centers for Disease Control and Prevention</b>                                                                                                                                                      | Grant / Contract | Self                                                                            |
| <i>Recipient Name:</i> Vanderbilt University Medical Center<br><i>Grant / Contract Description:</i> CDC supported the main site - Boston, and our site was a subsite<br><i>Additional Information:</i> |                  | <i>Recipient Type:</i> Institution<br><i>Grant / Contract Purpose:</i> Research |
| <b>SANOPI PASTEUR INC.</b>                                                                                                                                                                             | Grant / Contract | Self                                                                            |
| <i>Recipient Name:</i> Vanderbilt University Medical Center<br><i>Grant / Contract Description:</i> Donation of vaccines and HAI testing<br><i>Additional Information:</i>                             |                  | <i>Recipient Type:</i> Institution<br><i>Grant / Contract Purpose:</i> Research |

Additional Questions:

- Are there other relationships or activities that readers could perceive to have influenced, or that give the appearance of potentially influencing, what you wrote in the submitted work?**  
No.
- What is the manuscript title?**  
Maternal vaccination and risk of Covid-19 hospitalization among infants
- Are you the corresponding author?**  
No.

Certification

I certify that the information provided in this disclosure is complete and accurate.

Disclosure Purpose: 22-04399

Summary of Interests

**Company or Organization**

| Entity                                                                                                                                                                                   | Type             | Interest Held By                                                                |
|------------------------------------------------------------------------------------------------------------------------------------------------------------------------------------------|------------------|---------------------------------------------------------------------------------|
| Centers for Disease Control and Prevention                                                                                                                                               | Grant / Contract | Self                                                                            |
| <i>Recipient Name:</i> Central MI University<br><i>Grant / Contract Description:</i> Funded by CDC, via subcontract through Boston Children's Hospital<br><i>Additional Information:</i> |                  | <i>Recipient Type:</i> Institution<br><i>Grant / Contract Purpose:</i> Research |

Additional Questions:

- Are there other relationships or activities that readers could perceive to have influenced, or that give the appearance of potentially influencing, what you wrote in the submitted work?**  
No.
- What is the manuscript title?**  
Maternal vaccination and risk of Covid-19 hospitalization among infants
- Are you the corresponding author?**  
No.

Certification

I certify that the information provided in this disclosure is complete and accurate.

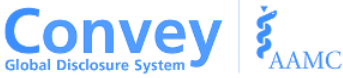



**Disclosure Purpose:** 22-04399

## Summary of Interests

| Entity                                                                                                                                                                                                                                                        | Type             | Interest Held By                                                                                          |
|---------------------------------------------------------------------------------------------------------------------------------------------------------------------------------------------------------------------------------------------------------------|------------------|-----------------------------------------------------------------------------------------------------------|
| <b>BioFire Diagnostics, LLC</b>                                                                                                                                                                                                                               | Consultant       | Self                                                                                                      |
| <i>Category:</i> Consultant<br><i>Additional Information:</i>                                                                                                                                                                                                 |                  | <i>Description:</i> Consultant-lecturer                                                                   |
| <b>Centers for Disease Control and Prevention</b>                                                                                                                                                                                                             | Grant / Contract | Self                                                                                                      |
| <i>Recipient Name:</i> University of Mississippi Medical Center<br><i>Grant / Contract Description:</i><br><i>Additional Information:</i>                                                                                                                     |                  | <i>Recipient Type:</i> Institution<br><i>Grant / Contract Purpose:</i> Other - public health surveillance |
| <b>Dynamed</b>                                                                                                                                                                                                                                                | Other            | Self                                                                                                      |
| <i>Category:</i> Other<br><i>Additional Information:</i> have been working with DYNAMED since 2018, the above refers to renewed contract. DYNAMED is similar to Up to Date, but writers/editors/medical consultants are NOT awarded by content access/viewed. |                  | <i>Description:</i> "triage" of articles that are added for content to Dynamed.com                        |

## Additional Questions:

- Are there other relationships or activities that readers could perceive to have influenced, or that give the appearance of potentially influencing, what you wrote in the submitted work?**  
No.
- What is the manuscript title?**  
Maternal vaccination and risk of Covid-19 hospitalization among infants
- Are you the corresponding author?**  
No.

## Certification

I certify that the information provided in this disclosure is complete and accurate.

Disclosure Purpose: 22-04399

Summary of Interests

| Company or Organization                                                                                                                                                                                                                                                                                                                                                                                                                                                                                                        |                  |                  |
|--------------------------------------------------------------------------------------------------------------------------------------------------------------------------------------------------------------------------------------------------------------------------------------------------------------------------------------------------------------------------------------------------------------------------------------------------------------------------------------------------------------------------------|------------------|------------------|
| Entity                                                                                                                                                                                                                                                                                                                                                                                                                                                                                                                         | Type             | Interest Held By |
| Centers for Disease Control and Prevention                                                                                                                                                                                                                                                                                                                                                                                                                                                                                     | Grant / Contract | Self             |
| <i>Recipient Name:</i> University of Minnesota<br><i>Grant / Contract Description:</i> Funded by CDC, via subcontract through Boston Children's Hospital coordinating center<br><i>Recipient Type:</i> Institution<br><i>Grant / Contract Purpose:</i> Research<br><i>Additional Information:</i>                                                                                                                                                                                                                              |                  |                  |
| Centers for Disease Control and Prevention                                                                                                                                                                                                                                                                                                                                                                                                                                                                                     | Grant / Contract | Self             |
| <i>Recipient Name:</i> University of Minnesota Masonic Children's Hospital<br><i>Grant / Contract Description:</i> Influenza Vaccine Effectiveness<br><i>Additional Information:</i> Influenza Vaccine Effectiveness for Preventing Laboratory-Confirmed Severe Influenza Associated Illness in US Children<br><i>Recipient Type:</i> Institution<br><i>Grant / Contract Purpose:</i> Research                                                                                                                                 |                  |                  |
| Pfizer Inc.                                                                                                                                                                                                                                                                                                                                                                                                                                                                                                                    | Grant / Contract | Self             |
| <i>Recipient Name:</i> University of Minnesota Masonic Children's Hospital<br><i>Grant / Contract Description:</i> Dexmedetomidine for MRI sedation trial<br><i>Additional Information:</i> A Phase 3/4 Randomized, Double-Blind, Dose-Ranging Study of the Safety and Efficacy of Dexmedetomidine (Dex) Used with Propofol (Pro) as Needed for Procedural Sedation of Pediatric Subjects ≥1 Month to <17 Years Of Age Undergoing MRI Scans<br><i>Recipient Type:</i> Institution<br><i>Grant / Contract Purpose:</i> Research |                  |                  |

Additional Questions:

- Are there other relationships or activities that readers could perceive to have influenced, or that give the appearance of potentially influencing, what you wrote in the submitted work?  
No.
- What is the manuscript title?  
Effectiveness of BNT162b2 Vaccine Against Omicron Hospitalizations in Children and Adolescents
- Are you the corresponding author?  
No.

Certification

I certify that the information provided in this disclosure is complete and accurate.

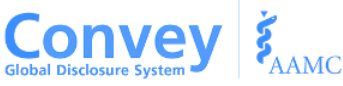

Disclosure Purpose: 22-04399

Summary of Interests

**Company or Organization**

| Entity                                                                                                                                                                         | Type             | Interest Held By                                                                                          |
|--------------------------------------------------------------------------------------------------------------------------------------------------------------------------------|------------------|-----------------------------------------------------------------------------------------------------------|
| Centers for Disease Control and Prevention                                                                                                                                     | Grant / Contract | Self                                                                                                      |
| <i>Recipient Name:</i> Arkansas Children's Research Institute<br><i>Grant / Contract Description:</i> Overcoming COVID<br><i>Additional Information:</i> Institutional Support |                  | <i>Recipient Type:</i> Institution<br><i>Grant / Contract Purpose:</i> Other - Public health surveillance |

Additional Questions:

- Are there other relationships or activities that readers could perceive to have influenced, or that give the appearance of potentially influencing, what you wrote in the submitted work?**  
No.
- What is the manuscript title?**  
Effectiveness of BNT162b2 Vaccine against Critical COVID-19 in Adolescents
- Are you the corresponding author?**  
No.

Certification

I certify that the information provided in this disclosure is complete and accurate.

Disclosure Purpose: 22-04399

Summary of Interests

| Company or Organization                                                                                                                                                                |                  |                                                                                                                   |
|----------------------------------------------------------------------------------------------------------------------------------------------------------------------------------------|------------------|-------------------------------------------------------------------------------------------------------------------|
| Entity                                                                                                                                                                                 | Type             | Interest Held By                                                                                                  |
| <b>Centers for Disease Control and Prevention</b>                                                                                                                                      | Grant / Contract | Self                                                                                                              |
| <i>Recipient Name:</i> Emory University<br><i>Grant / Contract Description:</i> Funds specifically for the work described in the current manuscript.<br><i>Additional Information:</i> |                  | <i>Recipient Type:</i> Institution<br><i>Grant / Contract Purpose:</i> Research                                   |
| <b>Janssen Pharmaceuticals, Inc</b>                                                                                                                                                    | Grant / Contract | Self                                                                                                              |
| <i>Recipient Name:</i> Emory University<br><i>Grant / Contract Description:</i> Funds from NIH for his work as a co-investigator on clinical trials of Janssen COVID-19 vaccine        |                  | <i>Recipient Type:</i> Institution<br><i>Grant / Contract Purpose:</i> Research<br><i>Additional Information:</i> |
| <b>Moderna</b>                                                                                                                                                                         | Grant / Contract | Self                                                                                                              |
| <i>Recipient Name:</i> Emory University<br><i>Grant / Contract Description:</i> Funds from NIH for his work as a co-investigator on clinical trials of Moderna COVID-19 vaccine        |                  | <i>Recipient Type:</i> Institution<br><i>Grant / Contract Purpose:</i> Research<br><i>Additional Information:</i> |
| <b>Pfizer</b>                                                                                                                                                                          | Grant / Contract | Self                                                                                                              |
| <i>Recipient Name:</i> Emory University<br><i>Grant / Contract Description:</i> Funds from Pfizer for his work as a co-investigator on clinical trials of Pfizer COVID-19 vaccine.     |                  | <i>Recipient Type:</i> Institution<br><i>Grant / Contract Purpose:</i> Research<br><i>Additional Information:</i> |

Additional Questions:

- Are there other relationships or activities that readers could perceive to have influenced, or that give the appearance of potentially influencing, what you wrote in the submitted work?**  
No.
- What is the manuscript title?**  
Maternal vaccination and risk of Covid-19 hospitalization among infants
- Are you the corresponding author?**  
No.

Certification

I certify that the information provided in this disclosure is complete and accurate.

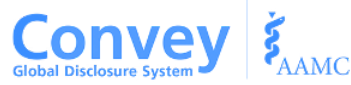

Disclosure Purpose: 22-04399

Summary of Interests

**Company or Organization**

| Entity                                                                                                                                                   | Type             | Interest Held By                                                                                                  |
|----------------------------------------------------------------------------------------------------------------------------------------------------------|------------------|-------------------------------------------------------------------------------------------------------------------|
| <a href="#">Centers for Disease Control and Prevention</a>                                                                                               | Grant / Contract | Self                                                                                                              |
| <i>Recipient Name:</i> UAB<br><i>Grant / Contract Description:</i> Funded by CDC, via subcontract through Boston Children's Hospital Coordinating Center |                  | <i>Recipient Type:</i> Institution<br><i>Grant / Contract Purpose:</i> Research<br><i>Additional Information:</i> |

Additional Questions:

- Are there other relationships or activities that readers could perceive to have influenced, or that give the appearance of potentially influencing, what you wrote in the submitted work?**  
No.
- What is the manuscript title?**  
Effectiveness of BNT162b2 Vaccine Against Omicron Hospitalizations in Children and Adolescents
- Are you the corresponding author?**  
No.

Certification

I certify that the information provided in this disclosure is complete and accurate.

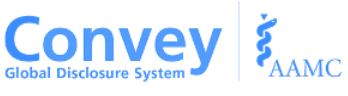

Disclosure Purpose: 22-04399

Summary of Interests

**Company or Organization**

| Entity                                                                                                                                                                                                                                                                                              | Type             | Interest Held By |
|-----------------------------------------------------------------------------------------------------------------------------------------------------------------------------------------------------------------------------------------------------------------------------------------------------|------------------|------------------|
| <a href="#">Centers for Disease Control and Prevention</a>                                                                                                                                                                                                                                          | Grant / Contract | Self             |
| <i>Recipient Name:</i> Mayo Clinic<br><i>Grant / Contract Description:</i> 75D30120C07725-01 Funded by CDC via subcontract with Boston Children's Hospital coordinating center<br><i>Recipient Type:</i> Institution<br><i>Grant / Contract Purpose:</i> Research<br><i>Additional Information:</i> |                  |                  |
| <a href="#">Division of Intramural Research, National Institute of Allergy and Infectious Diseases</a>                                                                                                                                                                                              | Grant / Contract | Self             |
| <i>Recipient Name:</i> Mayo Clinic<br><i>Grant / Contract Description:</i> AI144301-01<br><i>Additional Information:</i><br><i>Recipient Type:</i> Institution<br><i>Grant / Contract Purpose:</i> Research                                                                                         |                  |                  |

Additional Questions:

- Are there other relationships or activities that readers could perceive to have influenced, or that give the appearance of potentially influencing, what you wrote in the submitted work?**  
No.
- What is the manuscript title?**  
Maternal vaccination and risk of Covid-19 hospitalization among infants
- Are you the corresponding author?**  
No.

Certification

I certify that the information provided in this disclosure is complete and accurate.

Disclosure Purpose: 22-04399

Summary of Interests

**Company or Organization**

| Entity                                                                                                                                                                                | Type             | Interest Held By                                                                                                  |
|---------------------------------------------------------------------------------------------------------------------------------------------------------------------------------------|------------------|-------------------------------------------------------------------------------------------------------------------|
| Centers for Disease Control and Prevention                                                                                                                                            | Grant / Contract | Self                                                                                                              |
| <i>Recipient Name:</i> University of Texas Southwestern<br><i>Grant / Contract Description:</i> Funded by CDC, via subcontract through Boston Children's Hospital coordinating center |                  | <i>Recipient Type:</i> Institution<br><i>Grant / Contract Purpose:</i> Research<br><i>Additional Information:</i> |

Additional Questions:

- Are there other relationships or activities that readers could perceive to have influenced, or that give the appearance of potentially influencing, what you wrote in the submitted work?  
No.
- What is the manuscript title?  
Maternal vaccination and risk of Covid-19 hospitalization among infants
- Are you the corresponding author?  
No.

Certification

I certify that the information provided in this disclosure is complete and accurate.

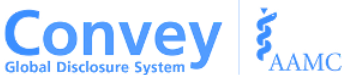

**Disclosure Purpose:** 22-04399

Summary of Interests

**Company or Organization**

| Entity                                                                                                                                                                                                                                                    | Type             | Interest Held By                                                                |
|-----------------------------------------------------------------------------------------------------------------------------------------------------------------------------------------------------------------------------------------------------------|------------------|---------------------------------------------------------------------------------|
| <a href="#">Centers for Disease Control and Prevention</a>                                                                                                                                                                                                | Grant / Contract | Self                                                                            |
| <i>Recipient Name:</i> MUSC<br><i>Grant / Contract Description:</i><br><i>Additional Information:</i> received funding from the CDC to your institution in support of this work and that was the funding specifically for the work described in the paper |                  | <i>Recipient Type:</i> Institution<br><i>Grant / Contract Purpose:</i> Research |

Additional Questions:

- Are there other relationships or activities that readers could perceive to have influenced, or that give the appearance of potentially influencing, what you wrote in the submitted work?**  
No.
- What is the manuscript title?**  
Effectiveness of BNT162b2 Vaccine against Critical COVID-19 in Adolescents
- Are you the corresponding author?**  
No.

Certification

I certify that the information provided in this disclosure is complete and accurate.



Disclosure Purpose: 22-04399

Summary of Interests

**Company or Organization**

| Entity                                                                                                                                                                                         | Type             | Interest Held By                                                                                                  |
|------------------------------------------------------------------------------------------------------------------------------------------------------------------------------------------------|------------------|-------------------------------------------------------------------------------------------------------------------|
| Centers for Disease Control and Prevention                                                                                                                                                     | Grant / Contract | Self                                                                                                              |
| <i>Recipient Name:</i> University of Colorado School of Medicine<br><i>Grant / Contract Description:</i> Funded by CDC, via subcontract through Boston Children's Hospital coordinating center |                  | <i>Recipient Type:</i> Institution<br><i>Grant / Contract Purpose:</i> Research<br><i>Additional Information:</i> |

Additional Questions:

- Are there other relationships or activities that readers could perceive to have influenced, or that give the appearance of potentially influencing, what you wrote in the submitted work?**  
No.
- What is the manuscript title?**  
Maternal vaccination and risk of Covid-19 hospitalization among infants
- Are you the corresponding author?**  
No.

Certification

I certify that the information provided in this disclosure is complete and accurate.



Disclosure Purpose: 22-04399

Summary of Interests

I do not have any interests to disclose at this time.

Additional Questions:

- 1. **Are there other relationships or activities that readers could perceive to have influenced, or that give the appearance of potentially influencing, what you wrote in the submitted work?**  
No.
- 2. **What is the manuscript title?**  
Maternal vaccination and risk of Covid-19 hospitalization among infants
- 3. **Are you the corresponding author?**  
No.

Certification

I certify that the information provided in this disclosure is complete and accurate.

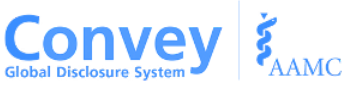

Disclosure Purpose: 22-04399

Summary of Interests

**Company or Organization**

| Entity                                                                                                                                     | Type             | Interest Held By                                                                |
|--------------------------------------------------------------------------------------------------------------------------------------------|------------------|---------------------------------------------------------------------------------|
| Centers for Disease Control and Prevention                                                                                                 | Grant / Contract | Self                                                                            |
| <i>Recipient Name:</i> Boston Children's Hospital<br><i>Grant / Contract Description:</i> 75D30121C10297<br><i>Additional Information:</i> |                  | <i>Recipient Type:</i> Institution<br><i>Grant / Contract Purpose:</i> Research |

Additional Questions:

- Are there other relationships or activities that readers could perceive to have influenced, or that give the appearance of potentially influencing, what you wrote in the submitted work?**  
No.
- What is the manuscript title?**  
Maternal vaccination and risk of Covid-19 hospitalization among infants
- Are you the corresponding author?**  
No.

Certification

I certify that the information provided in this disclosure is complete and accurate.

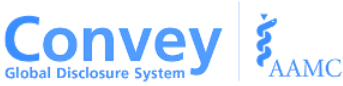

Disclosure Purpose: 22-04399

Summary of Interests

**Company or Organization**

| Entity                                                                                                                                                                                                | Type             | Interest Held By                                                                                                  |
|-------------------------------------------------------------------------------------------------------------------------------------------------------------------------------------------------------|------------------|-------------------------------------------------------------------------------------------------------------------|
| Centers for Disease Control and Prevention                                                                                                                                                            | Grant / Contract | Self                                                                                                              |
| <i>Recipient Name:</i> Akron Children's Hospital Research Institute<br><i>Grant / Contract Description:</i> Funded by the CDC, via subcontract through Boston Children's Hospital coordinating center |                  | <i>Recipient Type:</i> Institution<br><i>Grant / Contract Purpose:</i> Research<br><i>Additional Information:</i> |

Additional Questions:

- Are there other relationships or activities that readers could perceive to have influenced, or that give the appearance of potentially influencing, what you wrote in the submitted work?  
No.
- What is the manuscript title?  
Maternal vaccination and risk of Covid-19 hospitalization among infants
- Are you the corresponding author?  
No.

Certification

I certify that the information provided in this disclosure is complete and accurate.



**Disclosure Purpose:** 22-04399

**Summary of Interests**

I do not have any interests to disclose at this time.

**Additional Questions:**

- 1. **Are there other relationships or activities that readers could perceive to have influenced, or that give the appearance of potentially influencing, what you wrote in the submitted work?**  
No.
- 2. **What is the manuscript title?**  
Maternal vaccination and risk of Covid-19 hospitalization among infants
- 3. **Are you the corresponding author?**  
No.

**Certification**

I certify that the information provided in this disclosure is complete and accurate.

Disclosure Purpose: 22-04399

Summary of Interests

Company or Organization

| Entity                                                                                                                                                                                                               | Type             | Interest Held By                                                                                                  |
|----------------------------------------------------------------------------------------------------------------------------------------------------------------------------------------------------------------------|------------------|-------------------------------------------------------------------------------------------------------------------|
| <a href="#">AstraZeneca</a>                                                                                                                                                                                          | Grant / Contract | Self                                                                                                              |
| <i>Recipient Name:</i> Children's Hospital Los Angeles<br><i>Grant / Contract Description:</i> RSV studies<br><i>Additional Information:</i>                                                                         |                  | <i>Recipient Type:</i> Institution<br><i>Grant / Contract Purpose:</i> Research                                   |
| <a href="#">Centers for Disease Control and Prevention</a>                                                                                                                                                           | Grant / Contract | Self                                                                                                              |
| <i>Recipient Name:</i> Children's Hospital Los Angeles<br><i>Grant / Contract Description:</i> COVID-19 Vaccine Effectiveness Study - Support for work described in the manuscript<br><i>Additional Information:</i> |                  | <i>Recipient Type:</i> Institution<br><i>Grant / Contract Purpose:</i> Research<br><i>Additional Information:</i> |
| <a href="#">Pfizer</a>                                                                                                                                                                                               | Grant / Contract | Self                                                                                                              |
| <i>Recipient Name:</i> Children's Hospital Los Angeles<br><i>Grant / Contract Description:</i> Pneumococcus studies<br><i>Additional Information:</i>                                                                |                  | <i>Recipient Type:</i> Institution<br><i>Grant / Contract Purpose:</i> Research                                   |
| <a href="#">SANOFI PASTEUR INC.</a>                                                                                                                                                                                  | Consultant       | Self                                                                                                              |
| <i>Category:</i> Consultant<br><i>Additional Information:</i>                                                                                                                                                        |                  | <i>Description:</i>                                                                                               |
| <a href="#">Seqirus USA Inc</a>                                                                                                                                                                                      | Consultant       | Self                                                                                                              |
| <i>Category:</i> Consultant<br><i>Additional Information:</i>                                                                                                                                                        |                  | <i>Description:</i>                                                                                               |

Additional Questions:

- Are there other relationships or activities that readers could perceive to have influenced, or that give the appearance of potentially influencing, what you wrote in the submitted work?**

No.
- What is the manuscript title?**

Maternal vaccination and risk of Covid-19 hospitalization among infants
- Are you the corresponding author?**

No.

Certification

I certify that the information provided in this disclosure is complete and accurate.

**Disclosure Purpose:** 22-04399

### Summary of Interests

I do not have any interests to disclose at this time.

### Additional Questions:

1. **Are there other relationships or activities that readers could perceive to have influenced, or that give the appearance of potentially influencing, what you wrote in the submitted work?**

No.

2. **What is the manuscript title?**

Maternal vaccination and risk of Covid-19 hospitalization among infants

3. **Are you the corresponding author?**

Yes.

a. **Please list the other authors' names here.**

Natasha B. Halasa, MD1,\*; Samantha M. Olson, MPH2,\*; Mary A. Staat, MD3; Margaret M. Newhams, MPH4; Ashley M. Price, MPH2; Pia S. Pannaraj, MD5; Julie A. Boom, MD6; Leila C. Sahni, PhD, MPH6; Kathleen Chiotos, MD7; Melissa A. Cameron, MD8; Katherine E. Bline, MD9; Charlotte V. Hobbs, MD10; Aline B. Maddux, MD11; Bria M. Coates, MD12; Kelly N. Michelson, MD12; Sabrina M. Heidemann, MD13; Katherine Irby, MD14; Ryan A. Nofziger, MD15; Elizabeth H. Mack, MD16; Laura Smallcomb, MD17; Stephanie P. Schwartz, MD18; Tracie C. Walker, MD18; Shira J. Gertz, MD19; Jennifer E. Schuster, MD20; Satoshi Kamidani, MD21; Keiko M. Tarquinio, MD22; Samina S. Bhumbra, MD23; Mia Maamari, MD24; Janet R. Hume, MD25; Hillary Crandall, MD26; Emily R. Levy, MD27; Matt S. Zinter, MD28; Tamara T. Bradford, MD29; Heidi R. Flori, MD30; Melissa L. Cullimore, MD31; Michele Kong, MD32; Natalie Z. Cvijanovich, MD33; Suzanne M. Gilboa, PhD2; Kara N. Polen, MPH2; Angela P. Campbell, MD2; Adrienne G. Randolph, MD4,34,\*;

### Certification

I certify that the information provided in this disclosure is complete and accurate.

**Disclosure Purpose:** 22-04399

### Summary of Interests

I do not have any interests to disclose at this time.

### Additional Questions:

- Are there other relationships or activities that readers could perceive to have influenced, or that give the appearance of potentially influencing, what you wrote in the submitted work?**  
No.
- What is the manuscript title?**  
Maternal vaccination and risk of Covid-19 hospitalization among infants
- Are you the corresponding author?**  
No.

### Certification

I certify that the information provided in this disclosure is complete and accurate.



**Disclosure Purpose:** 22-04399

### Summary of Interests

I do not have any interests to disclose at this time.

### Additional Questions:

- Are there other relationships or activities that readers could perceive to have influenced, or that give the appearance of potentially influencing, what you wrote in the submitted work?**  
No.
- What is the manuscript title?**  
Maternal vaccination and risk of Covid-19 hospitalization among infants
- Are you the corresponding author?**  
No.

### Certification

I certify that the information provided in this disclosure is complete and accurate.

**Disclosure Purpose:** 22-04399

## Summary of Interests

| Company or Organization                                                                                                                                                         |                  |                                                                                                                                             |
|---------------------------------------------------------------------------------------------------------------------------------------------------------------------------------|------------------|---------------------------------------------------------------------------------------------------------------------------------------------|
| Entity                                                                                                                                                                          | Type             | Interest Held By                                                                                                                            |
| <a href="#">Centers for Disease Control and Prevention</a>                                                                                                                      | Grant / Contract | Self                                                                                                                                        |
| <i>Recipient Name:</i> Boston Children's Hospital<br><i>Grant / Contract Description:</i> Contract for investigating COVID-19 vaccine effectiveness in children and adolescents |                  | <i>Recipient Type:</i> Institution<br><i>Grant / Contract Purpose:</i> Other - Public Health Surveillance<br><i>Additional Information:</i> |

## Additional Questions:

- Are there other relationships or activities that readers could perceive to have influenced, or that give the appearance of potentially influencing, what you wrote in the submitted work?**  
No.
- What is the manuscript title?**  
Maternal vaccination and risk of Covid-19 hospitalization among infants
- Are you the corresponding author?**  
No.

## Certification

I certify that the information provided in this disclosure is complete and accurate.

Disclosure Purpose: 22-04399

Summary of Interests

**Company or Organization**

| Entity                                                                                                                                                                                                 | Type             | Interest Held By                                                                                                                                                                             |
|--------------------------------------------------------------------------------------------------------------------------------------------------------------------------------------------------------|------------------|----------------------------------------------------------------------------------------------------------------------------------------------------------------------------------------------|
| Centers for Disease Control and Prevention                                                                                                                                                             | Grant / Contract | Self                                                                                                                                                                                         |
| <i>Recipient Name:</i> Baylor College of Medicine<br><i>Grant / Contract Description:</i> New Vaccine Surveillance Network<br><i>Additional Information:</i> Effort to support activities as local PI. |                  | <i>Recipient Type:</i> Institution<br><i>Grant / Contract Purpose:</i> Other - Public health surveillance                                                                                    |
| Centers for Disease Control and Prevention                                                                                                                                                             | Grant / Contract | Self                                                                                                                                                                                         |
| <i>Recipient Name:</i> Baylor College of Medicine<br><i>Grant / Contract Description:</i> Funded by CDC, via subcontract through Boston Children's Hospital coordinating center                        |                  | <i>Recipient Type:</i> Institution<br><i>Grant / Contract Purpose:</i> Research<br><i>Additional Information:</i> Contract to conduct subject enrollment through Overcoming COVID-19 network |

Additional Questions:

- Are there other relationships or activities that readers could perceive to have influenced, or that give the appearance of potentially influencing, what you wrote in the submitted work?**  
No.
- What is the manuscript title?**  
Maternal vaccination and risk of Covid-19 hospitalization among infants
- Are you the corresponding author?**  
No.

Certification

I certify that the information provided in this disclosure is complete and accurate.

**Disclosure Purpose:** 22-04399

## Summary of Interests

| Company or Organization                                                                                                                                                                                                                              | Type             | Interest Held By |
|------------------------------------------------------------------------------------------------------------------------------------------------------------------------------------------------------------------------------------------------------|------------------|------------------|
| <b>Centers for Disease Control and Prevention</b><br><i>Recipient Name:</i> Children's Mercy Kansas City<br><i>Grant / Contract Description:</i> Funded by CDC, via subcontract through Boston Children's Hospital<br><i>Additional Information:</i> | Grant / Contract | Self             |
| <b>Merck</b><br><i>Recipient Name:</i> Children's Mercy Kansas City<br><i>Grant / Contract Description:</i> RSV monoclonal antibody clinical trial<br><i>Additional Information:</i>                                                                 | Grant / Contract | Self             |

## Additional Questions:

- Are there other relationships or activities that readers could perceive to have influenced, or that give the appearance of potentially influencing, what you wrote in the submitted work?**  
No.
- What is the manuscript title?**  
Maternal vaccination and risk of Covid-19 hospitalization among infants
- Are you the corresponding author?**  
No.

## Certification

I certify that the information provided in this disclosure is complete and accurate.

Disclosure Purpose: 22-04399

Summary of Interests

**Company or Organization**

| Entity                                                                                                                                                                                           | Type             | Interest Held By                                                                                                  |
|--------------------------------------------------------------------------------------------------------------------------------------------------------------------------------------------------|------------------|-------------------------------------------------------------------------------------------------------------------|
| Centers for Disease Control and Prevention                                                                                                                                                       | Grant / Contract | Self                                                                                                              |
| <i>Recipient Name:</i> University of North Carolina at Chapel Hill<br><i>Grant / Contract Description:</i> Funded by CDC, via subcontract through Boston Children's Hospital Coordinating Center |                  | <i>Recipient Type:</i> Institution<br><i>Grant / Contract Purpose:</i> Research<br><i>Additional Information:</i> |

Additional Questions:

- Are there other relationships or activities that readers could perceive to have influenced, or that give the appearance of potentially influencing, what you wrote in the submitted work?  
No.
- What is the manuscript title?  
Maternal vaccination and risk of Covid-19 hospitalization among infants
- Are you the corresponding author?  
No.

Certification

I certify that the information provided in this disclosure is complete and accurate.



**Disclosure Purpose:** 22-04399

**Summary of Interests**

I do not have any interests to disclose at this time.

**Additional Questions:**

- 1. **Are there other relationships or activities that readers could perceive to have influenced, or that give the appearance of potentially influencing, what you wrote in the submitted work?**  
No.
- 2. **What is the manuscript title?**  
Maternal vaccination and risk of Covid-19 hospitalization among infants
- 3. **Are you the corresponding author?**  
No.

**Certification**

I certify that the information provided in this disclosure is complete and accurate.

Disclosure Purpose: 22-04399

Summary of Interests

**Company or Organization**

| Entity                                                   | Type  | Interest Held By                                                                                          |
|----------------------------------------------------------|-------|-----------------------------------------------------------------------------------------------------------|
| Centers for Disease Control and Prevention               | Other | Self                                                                                                      |
| <i>Category:</i> Other<br><i>Additional Information:</i> |       | <i>Description:</i> Funded by CDC, via subcontract through Boston Children's Hospital coordinating center |

Additional Questions:

- Are there other relationships or activities that readers could perceive to have influenced, or that give the appearance of potentially influencing, what you wrote in the submitted work?**  
No.
- What is the manuscript title?**  
Effectiveness of BNT162b2 Vaccine Against Omicron Hospitalizations in Children and Adolescents
- Are you the corresponding author?**  
No.

Certification

I certify that the information provided in this disclosure is complete and accurate.

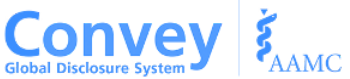

Disclosure Purpose: 22-04399

Summary of Interests

**Company or Organization**

| Entity                                                                                                                                                                                   | Type             | Interest Held By                                                                                                  |
|------------------------------------------------------------------------------------------------------------------------------------------------------------------------------------------|------------------|-------------------------------------------------------------------------------------------------------------------|
| <a href="#">Centers for Disease Control and Prevention</a>                                                                                                                               | Grant / Contract | Self                                                                                                              |
| <i>Recipient Name:</i> Emory University School of Medicine<br><i>Grant / Contract Description:</i> Funded by CDC, via subcontract through Boston Children's Hospital coordinating center |                  | <i>Recipient Type:</i> Institution<br><i>Grant / Contract Purpose:</i> Research<br><i>Additional Information:</i> |

Additional Questions:

- Are there other relationships or activities that readers could perceive to have influenced, or that give the appearance of potentially influencing, what you wrote in the submitted work?**  
No.
- What is the manuscript title?**  
Effectiveness of BNT162b2 Vaccine Against Omicron Hospitalizations in U.S. Children
- Are you the corresponding author?**  
No.

Certification

I certify that the information provided in this disclosure is complete and accurate.

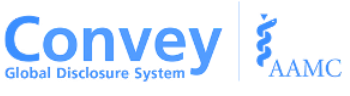



Disclosure Purpose: 22-04399

Summary of Interests

**Company or Organization**

| Entity                                                                                                                                                                           | Type             | Interest Held By                                                                                                  |
|----------------------------------------------------------------------------------------------------------------------------------------------------------------------------------|------------------|-------------------------------------------------------------------------------------------------------------------|
| <a href="#">Centers for Disease Control and Prevention</a>                                                                                                                       | Grant / Contract | Self                                                                                                              |
| <i>Recipient Name:</i> University of North Carolina<br><i>Grant / Contract Description:</i> funded by CDC via subcontract through Boston Children's Hospital coordinating center |                  | <i>Recipient Type:</i> Institution<br><i>Grant / Contract Purpose:</i> Research<br><i>Additional Information:</i> |

Additional Questions:

- Are there other relationships or activities that readers could perceive to have influenced, or that give the appearance of potentially influencing, what you wrote in the submitted work?**  
No.
- What is the manuscript title?**  
Effectiveness of BNT162b2 Vaccine Against Omicron Hospitalizations in Children and Adolescents
- Are you the corresponding author?**  
No.

Certification

I certify that the information provided in this disclosure is complete and accurate.



Disclosure Purpose: 22-04399

Summary of Interests

**Company or Organization**

| Entity                                                                                                                                                                                                                         | Type             | Interest Held By                                                                                          |
|--------------------------------------------------------------------------------------------------------------------------------------------------------------------------------------------------------------------------------|------------------|-----------------------------------------------------------------------------------------------------------|
| <a href="#">American Thoracic Society</a>                                                                                                                                                                                      | Grant / Contract | Self                                                                                                      |
| <i>Recipient Name:</i> University of California, San Francisco<br><i>Grant / Contract Description:</i> Unrestricted Grant<br><i>Additional Information:</i>                                                                    |                  | <i>Recipient Type:</i> Institution<br><i>Grant / Contract Purpose:</i> Research                           |
| <a href="#">Centers for Disease Control and Prevention</a>                                                                                                                                                                     | Grant / Contract | Self                                                                                                      |
| <i>Recipient Name:</i> University of California, San Francisco<br><i>Grant / Contract Description:</i> CDC surveillance of COVID-19<br><i>Additional Information:</i> grant for research/public health surveillance activities |                  | <i>Recipient Type:</i> Institution<br><i>Grant / Contract Purpose:</i> Other - public health surveillance |
| <a href="#">Eunice Kennedy Shriver National Institute of Child Health and Human Development</a>                                                                                                                                | Grant / Contract | Self                                                                                                      |
| <i>Recipient Name:</i> University of California, San Francisco<br><i>Grant / Contract Description:</i> K12HD000850<br><i>Additional Information:</i>                                                                           |                  | <i>Recipient Type:</i> Institution<br><i>Grant / Contract Purpose:</i> Research                           |
| <a href="#">National Heart, Lung, and Blood Institute</a>                                                                                                                                                                      | Grant / Contract | Self                                                                                                      |
| <i>Recipient Name:</i> University of California, San Francisco<br><i>Grant / Contract Description:</i> K23HL146936<br><i>Additional Information:</i>                                                                           |                  | <i>Recipient Type:</i> Institution<br><i>Grant / Contract Purpose:</i> Research                           |

Additional Questions:

- Are there other relationships or activities that readers could perceive to have influenced, or that give the appearance of potentially influencing, what you wrote in the submitted work?**  
No.
- What is the manuscript title?**  
Effectiveness of BNT162b2 Vaccine against Critical COVID-19 in Adolescents
- Are you the corresponding author?**  
No.

Certification

I certify that the information provided in this disclosure is complete and accurate.



Supplement: NEJMoa2204399_disclosures.pdf [file NEJMoa2204399_disclosures.pdf]
